# Supplementary material for: De novo assembly, annotation, and characterization of the whole brain transcriptome of male and female Syrian hamsters
Source: PubMed Central journal article supplement (PMC5223125; doi:10.1038/srep40472), 2017-01-10
Supplement: srep40472-s1.pdf [file srep40472-s1.pdf]

**De novo assembly, annotation, and characterization of the whole brain transcriptome of male and female Syrian hamsters – Supplemental Information**  
 KE McCann, DM Sinkiewicz, A Norvelle, KL Huhman

**Supplemental Table S1 Differential expression in male and female whole brain**

A comprehensive list of the transcripts that were differentially expressed in whole brain of male and female hamsters. Expression indicates in which sex the gene was more highly expressed. If both sexes are indicated, different isoforms of the same gene were differentially expressed in males and females. Transcripts with more than one isoform that were differentially expressed in the same direction are indicated by an \*. The two isoforms with the largest log<sub>2</sub> fold change are listed here. (Log<sub>2</sub>CPM = log<sub>2</sub> counts per million; Log<sub>2</sub>FC = log<sub>2</sub> fold change; FDR = false discovery rate)

| Gene ID        | Gene                                                                   | Uniprot ID  | Expression | Log <sub>2</sub> CPM | Log <sub>2</sub> FC  | FDR              |
|----------------|------------------------------------------------------------------------|-------------|------------|----------------------|----------------------|------------------|
| <b>Abcb7</b>   | ATP-binding cassette sub-family B member 7, mitochondrial              | ABCB7_RAT   | FEMALE     | 1.8682               | -9.8993              | 8.10e-06         |
| <b>Abcb10</b>  | ATP-binding cassette sub-family B member 10, mitochondrial             | ABCBA_MOUSE | FEMALE     | 0.5178               | -8.4718              | 0.0097           |
| <b>Adgra1</b>  | Adhesion G protein-coupled receptor A1                                 | AGRA1_MOUSE | FEMALE     | 0.798                | -8.7755              | 0.021            |
| <b>Anapc1</b>  | Anaphase-promoting complex subunit 1                                   | APC1_MOUSE  | MALE       | 1.6556               | 9.6833               | 0.0155           |
| <b>Apex1</b>   | DNA-(apurinic or apyrimidinic site) lyase                              | APEX1_MOUSE | FEMALE     | 0.8734               | -8.8556              | 0.0016           |
| <b>Asap3</b>   | Arf-GAP with SH3 domain, ANK repeat and PH domain-containing protein 3 | ASAP3_MOUSE | MALE       | 0.3546               | 8.3007               | 0.0254           |
| <b>Atp13a3</b> | Probable cation-transporting ATPase 13A3                               | AT133_MOUSE | FEMALE*    | 3.4765<br>2.1969     | -11.5394<br>-10.2374 | 0.0002<br>0.0043 |
| <b>Atp2b1</b>  | Plasma membrane calcium-transporting ATPase 1                          | AT2B1_RAT   | MALE       | 1.3529               | 9.3655               | 0.0278           |
| <b>Atp2c1</b>  | Calcium-transporting ATPase type 2c member 1                           | AT2C1_RAT   | MALE       | 0.5279               | 8.49                 | 0.0056           |
| <b>Bcor</b>    | BCL-6 corepressor                                                      | BCOR_MOUSE  | MALE       | 1.7008               | 9.7289               | 1.74e-07         |
| <b>Bmpr1b</b>  | Bone morphogenetic protein receptor type-1B                            | BMR1B_MOUSE | MALE       | 1.6322               | 9.6567               | 2.38e-05         |
| <b>Brd8</b>    | Bromodomain-containing protein 8                                       | BRD8_MOUSE  | MALE       | 1.4198               | 9.437                | 5.49e-06         |
| <b>Btf3l4</b>  | Transcription factor BTF3 homolog 4                                    | BT3L4_MOUSE | FEMALE     | 1.3263               | -9.3357              | 0.0335           |
| <b>C1ql3</b>   | Complement C1q-like protein 3                                          | C1QL3_MOUSE | FEMALE     | 2.8039               | -10.8576             | 0.001            |
| <b>Ccdc186</b> | Coiled-coil domain-containing protein 186                              | CC186_MOUSE | MALE       | 1.5801               | 9.6025               | 0.0161           |
| <b>Ccm2</b>    | Cerebral cavernous malformations protein 2 homolog                     | CCM2_MOUSE  | MALE       | 4.4286               | 12.4994              | 2.10e-37         |
| <b>Ccnt1</b>   | Cyclin-T1                                                              | CCNT1_MOUSE | FEMALE     | 0.1306               | -8.0454              | 0.0447           |

| Gene ID           | Gene                                                    | Uniprot ID  | Expression     | Log <sub>2</sub> CPM | Log <sub>2</sub> FC | FDR                  |
|-------------------|---------------------------------------------------------|-------------|----------------|----------------------|---------------------|----------------------|
| <b>Ccs</b>        | Copper chaperone for superoxide dismutase               | CCS_RAT     | FEMALE         | 0.7685               | -6.8224             | 0.0056               |
| <b>Cdr2l</b>      | Cerebellar degeneration-related protein 2-like          | CDR2L_MOUSE | FEMALE         | 0.5228               | -6.5572             | 0.0278               |
| <b>Cep68</b>      | Centrosomal protein of 68 kDa                           | CEP68_MOUSE | FEMALE         | 0.5788               | -8.5387             | 0.0047               |
| <b>Cfh</b>        | Complement factor H                                     | CFAH_MOUSE  | MALE           | 2.8678               | 10.9244             | 0.0007               |
| <b>Csgalnact1</b> | Chondroitin sulfate N-acetylgalactosaminyltransferase 1 | CGAT1_MOUSE | MALE           | 0.8869               | 8.8755              | 0.0009               |
| <b>Chd1</b>       | Chromodomain-helicase-DNA-binding protein 1             | CHD1_MOUSE  | MALE           | 0.7058               | 8.6822              | 0.0022               |
| <b>Chd5</b>       | Chromodomain-helicase-DNA-binding protein 5             | CHD5_MOUSE  | FEMALE<br>MALE | 3.2977<br>3.892      | -11.3587<br>3.0283  | 4.34e-11<br>0.0036   |
| <b>Cherp</b>      | Calcium homeostasis endoplasmic reticulum protein       | CHERP_MOUSE | MALE*          | 2.2514<br>1.3987     | 10.2957<br>9.4147   | 4.20e-09<br>2.38e-05 |
| <b>Cldnd1</b>     | Claudin domain-containing protein 1                     | CLDN1_MOUSE | FEMALE         | 1.4539               | -9.4687             | 0.0434               |
| <b>Cluh</b>       | Clustered mitochondria protein homolog                  | CLU_MOUSE   | MALE           | 1.6127               | 9.6364              | 0.0147               |
| <b>Cnot3</b>      | CCR4-NOT transcription complex subunit 3                | CNOT3_MOUSE | MALE           | 1.106                | 9.1079              | 0.0001               |
| <b>Col11a1</b>    | Collagen alpha-1(XI) chain                              | COBA1_RAT   | FEMALE         | 1.9882               | -10.0225            | 0.0083               |
| <b>Cog3</b>       | Conserved oligomeric Golgi complex subunit 3            | COG3_MOUSE  | FEMALE<br>MALE | 1.1847<br>0.1754     | -5.9638<br>8.1053   | 0.0073<br>0.0441     |
| <b>Col23a1</b>    | Collagen alpha-1(XXIII) chain                           | CONA1_RAT   | MALE           | 0.6327               | 8.6053              | 0.0091               |
| <b>Cpne2</b>      | Copine-2                                                | CPNE2_MOUSE | FEMALE         | 0.6616               | -8.6286             | 0.0055               |
| <b>Crym</b>       | Ketimine reductase mu-crystallin                        | CRYM_MOUSE  | MALE           | 1.2699               | 9.2809              | 0.0395               |
| <b>Ctnnal1</b>    | Alpha-catulin                                           | CTNL1_MOUSE | FEMALE         | 0.2623               | -8.1917             | 0.0184               |
| <b>Cit</b>        | Citron Rho-interacting kinase                           | CTRO_MOUSE  | MALE           | 2.1452               | 10.1862             | 0.0148               |
| <b>Ddx3y</b>      | ATP-dependent RNA helicase DDX3Y                        | DDX3Y_MOUSE | MALE*          | 4.0549<br>3.2276     | 12.1236<br>11.2887  | 6.34e-35<br>1.38e-22 |
| <b>Dll2</b>       | Protein delta homolog 2                                 | DLK2_MOUSE  | MALE           | 0.1694               | 8.0967              | 0.0255               |
| <b>Dmxl2</b>      | DmX-like protein 2                                      | DMXL2_MOUSE | FEMALE         | 0.5893               | -8.5503             | 0.0064               |

| Gene ID         | Gene                                                                    | Uniprot ID  | Expression | Log <sub>2</sub> CPM | Log <sub>2</sub> FC | FDR      |
|-----------------|-------------------------------------------------------------------------|-------------|------------|----------------------|---------------------|----------|
| <b>Dync2h1</b>  | Cytoplasmic dynein 2 heavy chain 1                                      | DYHC2_RAT   | MALE       | 0.8034               | 6.1817              | 0.0143   |
| <b>Edc4</b>     | Enhancer of mRNA-decapping protein 4                                    | EDC4_MOUSE  | MALE       | 2.6383               | 4.8642              | 0.0061   |
| <b>Ahctf1</b>   | Protein ELYS                                                            | ELYS_MOUSE  | FEMALE     | 1.2382               | -9.2431             | 0.0434   |
| <b>Eno1</b>     | Alpha-enolase                                                           | ENOA_RAT    | FEMALE     | 5.2262               | -1.6692             | 0.0123   |
| <b>Eps15</b>    | Epidermal growth factor receptor substrate 15                           | EPS15_MOUSE | FEMALE     | 2.6397               | -10.6909            | 0.0103   |
| <b>Erap1</b>    | Endoplasmic reticulum aminopeptidase 1                                  | ERAP1_RAT   | MALE       | 2.0498               | 10.0889             | 9.27e-06 |
| <b>Etfdh</b>    | Electron transfer flavoprotein-ubiquinone oxidoreductase, mitochondrial | ETFD_MOUSE  | FEMALE     | 1.6422               | -9.6655             | 0.0195   |
| <b>Ezh1</b>     | Histone-lysine N-methyltransferase EZH1                                 | EZH1_MOUSE  | MALE       | 0.4115               | 8.3644              | 0.0143   |
| <b>Fam126b</b>  | Protein FAM126B                                                         | F126B_MOUSE | MALE       | 1.6117               | 7.8203              | 0.0147   |
| <b>Fam83h</b>   | Protein FAM83H                                                          | FA83H_MOUSE | MALE       | 0.5042               | 8.4641              | 0.0065   |
| <b>Fastkd1</b>  | FAST kinase domain-containing protein 1                                 | FAKD1_MOUSE | FEMALE     | 0.9663               | -7.0326             | 0.0024   |
| <b>Fhl1</b>     | Four and a half LIM domains protein 1                                   | FHL1_RAT    | FEMALE     | 2.2709               | -10.3134            | 4.93e-06 |
| <b>Flii</b>     | Protein flightless-1 homolog                                            | FLII_MOUSE  | FEMALE     | 2.0696               | -10.1073            | 0.0094   |
| <b>Fuz</b>      | Protein fuzzy homology                                                  | FUZZY_MOUSE | FEMALE     | 1.3708               | -9.3818             | 1.00e-05 |
| <b>Fzr1</b>     | Fizzy-related protein homolog                                           | FZR_MOUSE   | MALE       | 0.2916               | 8.2326              | 0.0243   |
| <b>Gata2</b>    | Endothelial transcription factor GATA-2                                 | GATA2_RAT   | MALE       | 0.4306               | 6.5356              | 0.0335   |
| <b>Slc25a22</b> | Mitochondrial glutamate carrier 1                                       | GHC1_MOUSE  | MALE       | 0.8264               | 8.8105              | 0.0036   |
| <b>Gria3</b>    | Glutamate receptor 3                                                    | GRIA3_MOUSE | MALE       | 3.1849               | 11.2452             | 0.0016   |
| <b>Slc2a8</b>   | Solute carrier family 2, facilitated glucose transporter member 8       | GTR8_RAT    | FEMALE     | 1.4321               | -9.4458             | 7.50e-06 |
| <b>Hcfc2</b>    | Host cell factor 2                                                      | HCFC2_RAT   | FEMALE     | 0.7009               | -8.6703             | 0.0044   |
| <b>Hdac5</b>    | Histone deacetylase 5                                                   | HDAC5_CRIGR | MALE       | 1.4015               | 9.4178              | 5.90e-06 |

| Gene ID         | Gene                                                 | Uniprot ID  | Expression      | Log <sub>2</sub> CPM      | Log <sub>2</sub> FC          | FDR                              |
|-----------------|------------------------------------------------------|-------------|-----------------|---------------------------|------------------------------|----------------------------------|
| <b>Hepacam</b>  | Hepatocyte cell adhesion molecule                    | HECAM_MOUSE | MALE            | 0.2913                    | 8.2318                       | 0.0155                           |
| <b>Hes5</b>     | Transcription factor HES-5                           | HES5_RAT    | MALE            | 0.4392                    | 8.3943                       | 0.001                            |
| <b>Hipk2</b>    | Homeodomain-interacting protein kinase 2             | HIPK2_MESAU | FEMALE          | 0.2245                    | -8.1497                      | 0.02                             |
| <b>Hsp90ab1</b> | Heat shock protein HSP 90-beta                       | HS90B_RAT   | FEMALE          | 0.4423                    | -8.3901                      | 0.0145                           |
| <b>Ift172</b>   | Intraflagellar transport protein 172 homolog         | IF172_MOUSE | MALE            | 0.6419                    | 8.6126                       | 0.0055                           |
| <b>Eif5</b>     | Eukaryotic translation initiation factor 5           | IF5_MOUSE   | FEMALE          | 1.9854                    | -10.02                       | 0.0067                           |
| <b>Ppa2</b>     | Inorganic pyrophosphatase 2, mitochondrial           | IPYR2_MOUSE | MALE            | 0.2085                    | 8.1406                       | 0.0236                           |
| <b>Kiaa0556</b> | Uncharacterized protein KIAA0556                     | K0556_MOUSE | FEMALE          | 1.2715                    | -9.2776                      | 2.73e-05                         |
| <b>Kans11</b>   | KAT8 regulatory NSL complex subunit 1-like protein   | KAL1L_MOUSE | MALE            | 0.5851                    | 8.5525                       | 0.0044                           |
| <b>Kctd15</b>   | BTB/POZ domain-containing protein KCTD15             | KCD15_MOUSE | MALE            | 0.0662                    | 7.9819                       | 0.044                            |
| <b>Kcng4</b>    | Potassium voltage-gated channel subfamily G member 4 | KCNG4_MOUSE | MALE            | 2.0261                    | 10.0649                      | 4.52e-08                         |
| <b>Kdm1b</b>    | Lysine-specific histone demethylase 1B               | KDM1B_MOUSE | FEMALE          | 0.0825                    | -7.9911                      | 0.0401                           |
| <b>Kdm5c</b>    | Lysine-specific demethylase 5C                       | KDM5C_MOUSE | MALE            | 0.9258                    | 8.9171                       | 0.0006                           |
| <b>Kdm5d</b>    | Lysine-specific demethylase 5D                       | KDM5D_MOUSE | MALE*           | 2.6350<br>2.3792          | 10.6875<br>10.3741           | 1.03e-13<br>2.19e-11             |
| <b>Kdm6a</b>    | Lysine-specific demethylase 6A                       | KDM6A_MOUSE | FEMALE<br>MALE* | 1.6742<br>2.459<br>1.8701 | -9.6982<br>10.5080<br>9.9039 | 2.53e-07<br>1.78e-12<br>2.40e-08 |
| <b>Kif9</b>     | Kinesin-like protein KIF9                            | KIF9_MOUSE  | MALE            | 0.0779                    | 7.9955                       | 0.0407                           |
| <b>Krcc1</b>    | Lysine-rich coiled-coil protein 1                    | KRCC1_MOUSE | FEMALE          | 1.7253                    | -9.7512                      | 1.60e-06                         |
| <b>Rps6ka2</b>  | Ribosomal protein S6 kinase alpha-2                  | KS6A2_MOUSE | MALE            | 0.8603                    | 8.8476                       | 0.0008                           |
| <b>Faim2</b>    | Protein lifeguard 2                                  | LFG2_RAT    | FEMALE          | 1.4259                    | -9.4389                      | 0.0254                           |
| <b>Lin7b</b>    | Protein lin-7 homolog B                              | LIN7B_RAT   | FEMALE*         | 1.1887<br>0.3157          | -9.1904<br>-8.2504           | 4.51e-05<br>0.0173               |

| Gene ID         | Gene                                                                    | Uniprot ID  | Expression | Log <sub>2</sub> CPM | Log <sub>2</sub> FC | FDR                  |
|-----------------|-------------------------------------------------------------------------|-------------|------------|----------------------|---------------------|----------------------|
| <b>L3mbtl3</b>  | Lethal(3)malignant brain tumor-like protein 3                           | LMBL3_MOUSE | MALE       | 0.3534               | 8.3013              | 0.0189               |
| <b>Aatk</b>     | Serine/threonine-protein kinase LMTK1                                   | LMTK1_MOUSE | MALE       | 0.7763               | 8.7569              | 0.0044               |
| <b>Lrig2</b>    | Leucine-rich repeats and immunoglobulin-like domains protein 2          | LRIG2_MOUSE | MALE       | 2.0019               | 10.0396             | 3.73e-09             |
| <b>Lrp3</b>     | Low-density lipoprotein receptor-related protein 3                      | LRP3_RAT    | MALE       | 0.3543               | 8.3007              | 0.0139               |
| <b>Tmem57</b>   | Macoilin                                                                | MACOI_MOUSE | MALE       | 1.5568               | 9.5797              | 3.06e-06             |
| <b>Mam1d1</b>   | Mastermind-like domain-containing protein 1                             | MAMD1_MOUSE | MALE       | 0.8445               | 8.8306              | 0.0013               |
| <b>Map6</b>     | Microtubule-associated protein 6                                        | MAP6_MOUSE  | FEMALE     | 3.5744               | -11.6383            | 0.0003               |
| <b>Matk</b>     | Megakaryocyte-associated tyrosine-protein kinase                        | MATK_MOUSE  | FEMALE     | 0.5071               | -8.4606             | 0.0099               |
| <b>Mga</b>      | MAX gene-associated protein                                             | MGAP_MOUSE  | MALE       | 2.0658               | 10.1059             | 0.0056               |
| <b>Mgat5</b>    | Alpha-1,6-mannosylglycoprotein 6-beta-N-acetylglucosaminyltransferase A | MGT5A_CRIGR | FEMALE     | 1.5922               | -9.613              | 8.77e-07             |
| <b>Mink1</b>    | Misshapen-like kinase 1                                                 | MINK1_MOUSE | FEMALE     | 4.1235               | -12.1920            | 6.33e-05             |
| <b>Mapk13</b>   | Mitogen-activated protein kinase 13                                     | MK13_MOUSE  | MALE       | 0.5931               | 8.5596              | 0.0094               |
| <b>Mobp</b>     | Myelin-associated oligodendrocyte basic protein                         | MOBP_MOUSE  | MALE*      | 2.6728<br>0.9115     | 10.7258<br>8.9032   | 1.66e-10<br>0.0142   |
| <b>Mpeg1</b>    | Macrophage-expressed gene 1 protein                                     | MPEG1_MOUSE | FEMALE     | 1.6734               | -9.6972             | 0.0142               |
| <b>Cdc42bpb</b> | Serine/threonine-protein kinase MRCK beta                               | MRCKB_MOUSE | MALE*      | 1.2818<br>4.8863     | 9.293<br>12.9594    | 0.0389<br>9.02e-45   |
| <b>Mreg</b>     | Melanoregulin                                                           | MREG_MOUSE  | FEMALE     | 0.691                | -8.6604             | 0.011                |
| <b>Msl3</b>     | Male-specific lethal 3 homolog                                          | MS3L1_MOUSE | MALE       | 1.6052               | 9.6285              | 0.0173               |
| <b>N4bp2l1</b>  | NEDD4-binding protein 2-like 1                                          | N42L1_MOUSE | MALE*      | 1.7175<br>1.2462     | 9.7463<br>9.2553    | 4.40e-07<br>2.99e-05 |
| <b>Neur14</b>   | Neuralized-like protein 4                                               | NEUL4_MOUSE | FEMALE     | 1.9839               | -10.0185            | 1.70e-08             |
| <b>Nfyc</b>     | Nuclear transcription factor Y subunit gamma                            | NFYC_RAT    | FEMALE     | 0.7236               | -6.7245             | 0.021                |
| <b>Olfm2</b>    | Noelin-2                                                                | NOE2_RAT    | FEMALE     | 2.7037               | -10.7557            | 0.0132               |

| Gene ID        | Gene                                                                          | Uniprot ID  | Expression     | Log <sub>2</sub> CPM | Log <sub>2</sub> FC | FDR                |
|----------------|-------------------------------------------------------------------------------|-------------|----------------|----------------------|---------------------|--------------------|
| <b>Nrdc</b>    | Nardilysin                                                                    | NRDC_MOUSE  | MALE           | 0.4011               | 8.3516              | 0.0112             |
| <b>Nsun5</b>   | Probable 28S rRNA (cytosine-C(5))-methyltransferase                           | NSUN5_MOUSE | MALE           | 1.3223               | 9.3338              | 0.0044             |
| <b>Nudcd3</b>  | NudC domain-containing protein 3                                              | NUDC3_MOUSE | MALE           | 2.0976               | 10.138              | 4.20e-09           |
| <b>Oma1</b>    | Metalloendopeptidase OMA1, mitochondrial                                      | OMA1_MOUSE  | FEMALE         | 0.9356               | -6.9995             | 0.0023             |
| <b>Otof</b>    | Otoferlin                                                                     | OTOF_RAT    | MALE           | 0.2185               | 8.1531              | 0.0335             |
| <b>Pawr</b>    | PRKC apoptosis WT1 regulator protein                                          | PAWR_MOUSE  | FEMALE         | 0.7591               | -8.7334             | 0.0023             |
| <b>Pcdhb14</b> | Protocadherin beta-14                                                         | PCDBE_MOUSE | FEMALE         | 1.3663               | -9.3771             | 7.89e-06           |
| <b>Pcnx</b>    | Pecanex-like protein 1                                                        | PCX1_MOUSE  | MALE           | 2.2225               | 5.6478              | 1.99e-05           |
| <b>Per3</b>    | Period circadian protein homolog 3                                            | PER3_RAT    | FEMALE         | 2.2536               | -8.3834             | 0.0094             |
| <b>Rabgga</b>  | Geranylgeranyl transferase type-2 subunit alpha                               | PGTA_RAT    | MALE           | 0.5895               | 8.5586              | 0.01               |
| <b>Phyhip</b>  | Phytanoyl-CoA hydroxylase-interacting protein                                 | PHYIP_RAT   | FEMALE         | 2.5971               | -10.6471            | 2.02e-12           |
| <b>Pitpna</b>  | Phosphatidylinositol transfer protein alpha isoform                           | PIPNA_MOUSE | FEMALE<br>MALE | 2.0014<br>2.1982     | -8.1146<br>5.7933   | 6.06e-08<br>0.0003 |
| <b>Plec</b>    | Plectin                                                                       | PLEC_CRIGR  | MALE           | 1.7266               | 9.7561              | 0.0125             |
| <b>Plod3</b>   | Procollagen-lysine,2-oxoglutarate 5-dioxygenase 3                             | PLOD3_MOUSE | MALE           | 0.543                | 8.5086              | 0.0141             |
| <b>Plxnb2</b>  | Plexin-B2                                                                     | PLXB2_MOUSE | MALE           | 2.7341               | 10.7881             | 6.75e-15           |
| <b>Ppp1r3e</b> | Protein phosphatase 1 regulatory subunit 3E                                   | PPR3E_MOUSE | MALE           | 0.1543               | 8.0792              | 0.0436             |
| <b>Prex2</b>   | Phosphatidylinositol 3,4,5-triphosphate-dependent Rac exchanger 2 protein     | PREX2_MOUSE | MALE           | 1.7503               | 4.3581              | 0.0205             |
| <b>Primpol</b> | DNA-directed primase/polymerase protein                                       | PRIPO_MOUSE | MALE           | 0.3368               | 8.2826              | 0.0143             |
| <b>Prkra</b>   | Interferon-inducible double-stranded RNA-dependent protein kinase activator A | PRKRA_RAT   | MALE           | 1.4564               | 9.4753              | 0.024              |
| <b>Ptpn</b>    | Receptor-type tyrosine-protein phosphatase-like N                             | PTPRN_RAT   | MALE           | 1.8027               | 9.8332              | 0.0094             |
| <b>Ptpro</b>   | Receptor-type tyrosine-protein phosphatase O                                  | PTPRO_MOUSE | MALE           | 0.0993               | 8.0179              | 0.0458             |

| Gene ID           | Gene                                                                                                   | Uniprot ID  | Expression      | Log <sub>2</sub> CPM       | Log <sub>2</sub> FC         | FDR                          |
|-------------------|--------------------------------------------------------------------------------------------------------|-------------|-----------------|----------------------------|-----------------------------|------------------------------|
| <b>Pus7l</b>      | Pseudouridylate synthase 7 homolog-like protein                                                        | PUS7L_MOUSE | FEMALE          | 0.3236                     | -8.2596                     | 0.0165                       |
| <b>Rb1cc1</b>     | RB1-inducible coiled-coil protein 1                                                                    | RBCC1_MOUSE | MALE            | 0.5686                     | 8.5351                      | 0.0069                       |
| <b>Rbm45</b>      | RNA-binding protein 45                                                                                 | RBM45_RAT   | FEMALE          | 1.7605                     | -9.7882                     | 0.0173                       |
| <b>Rexo1</b>      | RNA exonuclease 1 homolog                                                                              | REXO1_MOUSE | MALE            | 0.2996                     | 8.2417                      | 0.0165                       |
| <b>Rfx5</b>       | DNA-binding protein Rfx5                                                                               | RFX5_MOUSE  | FEMALE<br>MALE* | 8.3022<br>4.1427<br>3.1396 | -7.1923<br>1.8574<br>2.3186 | 2.60e-25<br>0.0061<br>0.0123 |
| <b>Rgs8</b>       | Regulator of G-protein signaling 8                                                                     | RGS8_RAT    | MALE            | 5.2094                     | 6.2431                      | 1.02e-09                     |
| <b>Riok1</b>      | Serine/threonine-protein kinase RIO1                                                                   | RIOK1_MOUSE | MALE            | 0.1161                     | 8.0368                      | 0.0363                       |
| <b>Rnf212</b>     | Probable E3 SUMO-protein ligase RNF212                                                                 | RN212_MOUSE | MALE            | 0.6076                     | 5.9705                      | 0.0401                       |
| <b>Rapgef2</b>    | Rap guanine nucleotide exchange factor 2                                                               | RPGF2_MOUSE | MALE            | 1.4172                     | 9.434                       | 7.59e-06                     |
| <b>Rreb1</b>      | Ras-responsive element-binding protein 1                                                               | RREB1_MOUSE | MALE            | 0.9079                     | 8.8995                      | 0.0034                       |
| <b>Rtf1</b>       | RNA polymerase-associated protein RTF1 homolog                                                         | RTF1_MOUSE  | FEMALE          | 1.9768                     | -10.0117                    | 0.012                        |
| <b>Rubcn</b>      | Run domain Beclin-1-interacting and cysteine-rich domain containing protein                            | RUBIC_MOUSE | FEMALE          | 1.2494                     | -5.6551                     | 0.0088                       |
| <b>Slc12a6</b>    | Solute carrier family 12 member 6                                                                      | S12A6_MOUSE | FEMALE          | 2.0197                     | -10.0551                    | 0.0062                       |
| <b>Sec61a1</b>    | Protein transport protein Sec61 subunit alpha isoform 1                                                | S61A1_RAT   | MALE            | 0.5554                     | 8.5207                      | 0.0085                       |
| <b>Sec22c</b>     | Vesicle-trafficking protein SEC22c                                                                     | SC22C_MOUSE | FEMALE          | 0.731                      | -8.7037                     | 0.0123                       |
| <b>Sdccag3</b>    | Serologically defined colon cancer antigen 3 homolog                                                   | SDCG3_MOUSE | MALE            | 1.2292                     | 9.2385                      | 0.0437                       |
| <b>Setd5</b>      | SET domain-containing protein 5                                                                        | SETD5_MOUSE | MALE            | 2.3497                     | 10.3963                     | 5.75e-12                     |
| <b>St6galnac4</b> | Alpha-N-acetyl-neuraminyl-2,3-beta-galactosyl-1,3-N-acetyl-galactosaminide alpha-2,6-sialyltransferase | SIA7D_MOUSE | MALE            | 0.7586                     | 8.7371                      | 0.0125                       |
| <b>Snx24</b>      | Sorting nexin-24                                                                                       | SNX24_RAT   | FEMALE          | 0.0997                     | -8.0101                     | 0.0361                       |
| <b>Spata7</b>     | Spermatogenesis-associated protein 7 homolog                                                           | SPAT7_MOUSE | MALE            | 1.7324                     | 7.9474                      | 0.031                        |

| Gene ID         | Gene                                                 | Uniprot ID  | Expression | Log <sub>2</sub> CPM | Log <sub>2</sub> FC | FDR      |
|-----------------|------------------------------------------------------|-------------|------------|----------------------|---------------------|----------|
| <b>Stra6</b>    | Stimulated by retinoic acid gene 6 protein homolog   | STRA6_RAT   | FEMALE     | 0.4312               | -8.3769             | 0.022    |
| <b>Suco</b>     | SUN domain-containing ossification factor            | SUCO_MOUSE  | MALE       | 1.3462               | 9.36                | 9.65e-06 |
| <b>Sympk</b>    | Symplekin                                            | SYMPK_MOUSE | MALE       | 1.3501               | 5.3435              | 0.0441   |
| <b>Rars</b>     | Arginine--tRNA ligase, cytoplasmic                   | SYRC_CRIGR  | FEMALE     | 2.7887               | -10.8424            | 0.0011   |
| <b>Tll1</b>     | Tolloid-like protein 1                               | TLL1_MOUSE  | FEMALE     | 1.0197               | -6.2939             | 0.0061   |
|                 |                                                      |             | MALE       | 0.3631               | 8.3103              | 0.0125   |
| <b>Tmem18</b>   | Transmembrane protein 18                             | TMM18_RAT   | FEMALE     | 2.0363               | -10.0726            | 6.31e-09 |
| <b>Txnrd3</b>   | Thioredoxin reductase 3                              | TRXR3_MOUSE | FEMALE     | 0.4357               | -8.383              | 0.0139   |
| <b>Txndc11</b>  | Thioredoxin domain-containing protein 11             | TXD11_MOUSE | FEMALE     | 1.5653               | -7.6703             | 0.0044   |
| <b>Tyk2</b>     | Non-receptor tyrosine-protein kinase TYK2            | TYK2_MOUSE  | FEMALE     | 1.5463               | -9.5649             | 0.0193   |
| <b>Usp14</b>    | Ubiquitin carboxyl-terminal hydrolase 14             | UBP14_MOUSE | MALE       | 0.8542               | 8.8392              | 0.0119   |
| <b>Usp16</b>    | Ubiquitin carboxyl-terminal hydrolase 16             | UBP16_RAT   | MALE       | 0.4519               | 8.4082              | 0.0098   |
| <b>Unc13a</b>   | Protein unc-13 homolog A                             | UN13A_MOUSE | MALE       | 2.0976               | 5.732               | 0.0026   |
| <b>Usp9x</b>    | Probable ubiquitin carboxyl-terminal hydrolase FAF-X | USP9X_MOUSE | MALE*      | 3.6714               | 11.7372             | 5.86e-27 |
|                 |                                                      |             |            | 3.1267               | 11.1865             | 1.48e-18 |
| <b>Uty</b>      | Histone demethylase UTY                              | UTY_MOUSE   | MALE*      | 2.8309               | 10.8864             | 1.26e-16 |
|                 |                                                      |             |            | 1.6003               | 9.6247              | 8.76e-07 |
| <b>Vmn2r116</b> | Vomer nasal type-2 receptor 116                      | V2116_MOUSE | FEMALE     | 0.3412               | -8.2786             | 0.0143   |
| <b>Vasp</b>     | Vasodilator-stimulated phosphoprotein                | VASP_MOUSE  | FEMALE     | 0.2785               | -8.2087             | 0.0401   |
| <b>Hdlbp</b>    | Vigilin                                              | VIGLN_MOUSE | MALE       | 0.2214               | 8.1544              | 0.0203   |
| <b>Vps13c</b>   | Vacuolar protein sorting-associated protein          | VP13C_MOUSE | MALE       | 4.0828               | 8.1066              | 4.31e-21 |
| <b>Wdfy3</b>    | WD repeat and FYVE domain-containing protein 3       | WDFY3_MOUSE | MALE       | 1.3295               | 6.2107              | 0.0045   |
| <b>Wiz</b>      | Protein Wiz                                          | WIZ_MOUSE   | FEMALE     | 2.1174               | -10.156             | 1.11e-08 |
| <b>Wnk2</b>     | Serine/threonine-protein kinase WNK2                 | WNK2_MOUSE  | MALE       | 1.7661               | 9.797               | 4.56e-06 |



| Gene ID        | Gene                                             | Uniprot ID  | Expression     | Log <sub>2</sub> CPM | Log <sub>2</sub> FC | FDR              |
|----------------|--------------------------------------------------|-------------|----------------|----------------------|---------------------|------------------|
| <b>Xpo4</b>    | Exportin-4                                       | XPO4_MOUSE  | FEMALE         | 1.2088               | -9.2121             | 0.0458           |
| <b>Yme111</b>  | ATP-dependent zinc metalloprotease YME1L1        | YMEL1_MOUSE | MALE           | 0.8076               | 5.6701              | 0.0193           |
| <b>Zbtb46</b>  | Zinc finger and BTB domain-containing protein 46 | ZBT46_MOUSE | MALE           | 0.6018               | 8.5702              | 0.0038           |
| <b>Zfyve16</b> | Zinc finger FYVE domain-containing protein 16    | ZFY16_MOUSE | FEMALE         | 0.4596               | -8.409              | 0.0193           |
| <b>Znf569</b>  | Zinc finger protein 569                          | ZN569_MOUSE | FEMALE         | 0.4599               | -8.4091             | 0.0077           |
| <b>Znf18</b>   | Zinc finger protein 18                           | ZNF18_RAT   | FEMALE<br>MALE | -4.8543<br>2.0655    | 3.2728<br>3.8641    | 0.0031<br>0.0293 |
| <b>Zswim6</b>  | Zinc finger SWIM domain-containing protein 6     | ZSWM6_MOUSE | MALE           | 2.5167               | 10.5679             | 0.0044           |

### Supplemental Table S2 Gene ontology enrichment analysis

A comprehensive list of the 142 gene ontology (GO) terms that were enriched in male hamster brains compared with female hamster brains.

(BP = biological process; CC = cellular component; MF = molecular function; FDR = false discovery rate)

| GO term                                        | Ontology | Over-represented FDR |
|------------------------------------------------|----------|----------------------|
| Cardiac muscle cell contraction                | BP       | 7.52E-09             |
| Cerebellar cortex structural organization      | BP       | 0                    |
| T cell antigen processing and presentation     | BP       | 2.09E-07             |
| Regulation of forebrain neuron differentiation | BP       | 0.0236               |
| Notochord morphogenesis                        | BP       | 0.001                |
| Mesodermal cell differentiation                | BP       | 0.001                |
| Somite rostral/caudal axis specification       | BP       | 0.0005               |
| Histone H3-K27 demethylation                   | BP       | 0.0011               |
| Histone H3-K4 demethylation                    | BP       | 4.49E-06             |
| Respiratory system process                     | BP       | 0.001                |
| Actin-mediated cell contraction                | BP       | 7.58E-06             |
| Cardiovascular system development              | BP       | 0.003                |
| Histone H3-K36 demethylation                   | BP       | 4.49E-06             |
| Anatomical structure arrangement               | BP       | 7.09E-08             |
| Histone lysine demethylation                   | BP       | 8.82E-13             |

| GO term                                                                  | Ontology | Over-represented FDR |
|--------------------------------------------------------------------------|----------|----------------------|
| Histone demethylation                                                    | BP       | 8.82E-13             |
| Protein demethylation                                                    | BP       | 8.82E-13             |
| Protein dealkylation                                                     | BP       | 8.82E-13             |
| Regulation of chromatin silencing                                        | BP       | 3.13E-05             |
| Translational initiation                                                 | BP       | 7.09E-08             |
| Demethylation                                                            | BP       | 1.69E-11             |
| BMP signaling pathway                                                    | BP       | 1.99E-07             |
| Chromosome segregation                                                   | BP       | 4.51E-15             |
| Axon extension                                                           | BP       | 1.03E-05             |
| Anterior/posterior axis specification                                    | BP       | 0.0152               |
| Respiratory gaseous exchange                                             | BP       | 0.0227               |
| Embryonic axis specification                                             | BP       | 0.0273               |
| Regulation of gene silencing                                             | BP       | 0.0006               |
| Neural tube development                                                  | BP       | 0.0004               |
| Actin filament-based movement                                            | BP       | 0.0008               |
| RNA secondary structure unwinding                                        | BP       | 7.52E-06             |
| Cellular response to transforming growth factor beta stimulus            | BP       | 0.0001               |
| Heart morphogenesis                                                      | BP       | 0.0006               |
| Transforming growth factor beta receptor signaling pathway               | BP       | 1.75E-05             |
| Neuron projection extension                                              | BP       | 0.0001               |
| Response to transforming growth factor beta                              | BP       | 0.0002               |
| Antigen processing and presentation                                      | BP       | 0.0008               |
| Canonical Wnt signaling pathway                                          | BP       | 0.0011               |
| Hippocampus development                                                  | BP       | 0.0003               |
| Post-embryonic development                                               | BP       | 0.001                |
| Neuron migration                                                         | BP       | 5.44E-05             |
| Developmental cell growth                                                | BP       | 0.0009               |
| Transmembrane receptor protein serine/threonine kinase signaling pathway | BP       | 0.0003               |
| Protein deubiquitination                                                 | BP       | 0.0007               |
| Developmental growth involved in morphogenesis                           | BP       | 0.003                |

| GO term                                                    | Ontology | Over-represented FDR |
|------------------------------------------------------------|----------|----------------------|
| Cell growth                                                | BP       | 0.0009               |
| Chordate embryonic development                             | BP       | 5.63E-08             |
| Embryo development ending in birth or egg hatching         | BP       | 5.76E-08             |
| In utero embryonic development                             | BP       | 2.81E-07             |
| Heart development                                          | BP       | 7.53E-06             |
| Embryonic organ development                                | BP       | 0.008                |
| Embryo development                                         | BP       | 1.99E-07             |
| Protein modification by small protein removal              | BP       | 0.002                |
| Epithelium development                                     | BP       | 0.0092               |
| Mitotic nuclear division                                   | BP       | 0.0004               |
| Tube development                                           | BP       | 0.0361               |
| Developmental growth                                       | BP       | 0.0115               |
| Histone modification                                       | BP       | 9.25E-06             |
| Cellular response to growth factor stimulus                | BP       | 0.0073               |
| Growth                                                     | BP       | 0.0002               |
| Covalent chromatin modification                            | BP       | 1.06E-05             |
| Nuclear division                                           | BP       | 0.0027               |
| Response to growth factor                                  | BP       | 0.0144               |
| Organelle fission                                          | BP       | 0.0045               |
| Chromatin modification                                     | BP       | 2.61E-05             |
| Ubiquitin-dependent protein catabolic process              | BP       | 0.0162               |
| Modification-dependent protein catabolic process           | BP       | 0.0178               |
| Chromatin organization                                     | BP       | 6.61E-05             |
| Modification-dependent macromolecule catabolic process     | BP       | 0.02                 |
| Organ morphogenesis                                        | BP       | 0.0408               |
| Proteolysis involved in cellular protein catabolic process | BP       | 0.0114               |
| Cell division                                              | BP       | 0.0197               |
| Proteolysis                                                | BP       | 0.0375               |
| Movement of cell or subcellular component                  | BP       | 0.0139               |
| Cellular protein modification process                      | BP       | 5.56E-06             |

| GO term                                                   | Ontology | Over-represented FDR |
|-----------------------------------------------------------|----------|----------------------|
| Protein modification process                              | BP       | 5.56E-06             |
| Macromolecule modification                                | BP       | 2.16E-05             |
| Single-organism organelle organization                    | BP       | 0.0023               |
| Cellular protein metabolic process                        | BP       | 4.97E-05             |
| Protein metabolic process                                 | BP       | 4.83E-06             |
| Anatomical structure development                          | BP       | 0.0067               |
| Regulation of gene expression                             | BP       | 9.61E-05             |
| Organelle organization                                    | BP       | 0.0064               |
| Regulation of transcription, DNA-templated                | BP       | 0.0061               |
| Regulation of nucleic acid-templated transcription        | BP       | 0.0065               |
| Regulation of RNA biosynthetic process                    | BP       | 0.0065               |
| Regulation of RNA metabolic process                       | BP       | 0.0142               |
| Regulation of macromolecule biosynthetic process          | BP       | 0.0341               |
| Regulation of cellular macromolecule biosynthetic process | BP       | 0.0441               |
| Regulation of macromolecule metabolic process             | BP       | 0.0012               |
| Regulation of biosynthetic process                        | BP       | 0.0462               |
| Macromolecule metabolic process                           | BP       | 1.95E-06             |
| Cellular macromolecule metabolic process                  | BP       | 4.16E-05             |
| Cellular component organization                           | BP       | 0.0176               |
| Cellular component organization or biogenesis             | BP       | 0.0217               |
| Regulation of metabolic process                           | BP       | 0.0115               |
| Primary metabolic process                                 | BP       | 0.0006               |
| Organic substance metabolic process                       | BP       | 0.0024               |
| Metabolic process                                         | BP       | 0.005                |
| Cellular metabolic process                                | BP       | 0.0309               |
| Apical part of cell                                       | CC       | 2.47E-06             |
| Cytoplasmic ribonucleoprotein granule                     | CC       | 0.0001               |
| Ribonucleoprotein granule                                 | CC       | 0.0002               |
| Histone methyltransferase complex                         | CC       | 0.0335               |
| Methyltransferase complex                                 | CC       | 0.0491               |

| GO term                                                                                                                                                                                           | Ontology | Over-represented FDR |
|---------------------------------------------------------------------------------------------------------------------------------------------------------------------------------------------------|----------|----------------------|
| Growth cone                                                                                                                                                                                       | CC       | 0.02                 |
| Site of polarized growth                                                                                                                                                                          | CC       | 0.0234               |
| Co-SMAD binding                                                                                                                                                                                   | MF       | 0                    |
| Histone demethylase activity (H3-K27 specific)                                                                                                                                                    | MF       | 2.78E-08             |
| Histone demethylase activity (H3-K36 specific)                                                                                                                                                    | MF       | 1.27E-06             |
| Histone demethylase activity (H3-K4 specific)                                                                                                                                                     | MF       | 2.66E-06             |
| Histone demethylase activity                                                                                                                                                                      | MF       | 3.71E-13             |
| Demethylase activity                                                                                                                                                                              | MF       | 8.82E-13             |
| Oxidoreductase activity, acting on paired donors, with incorporation or reduction of molecular oxygen, 2-oxoglutarate as one donor, and incorporation of one atom each of oxygen into both donors | MF       | 1.72E-12             |
| SMAD binding                                                                                                                                                                                      | MF       | 2.63E-06             |
| Dioxygenase activity                                                                                                                                                                              | MF       | 7.36E-11             |
| Oxidoreductase activity, acting on paired donors, with incorporation or reduction of molecular oxygen                                                                                             | MF       | 1.28E-08             |
| ATP-dependent RNA helicase activity                                                                                                                                                               | MF       | 0.0005               |
| RNA-dependent atpase activity                                                                                                                                                                     | MF       | 0.0005               |
| RNA helicase activity                                                                                                                                                                             | MF       | 0.0006               |
| Ubiquitinyl hydrolase activity                                                                                                                                                                    | MF       | 0.0003               |
| ATP-dependent helicase activity                                                                                                                                                                   | MF       | 0.001                |
| Purine NTP-dependent helicase activity                                                                                                                                                            | MF       | 0.001                |
| Cysteine-type peptidase activity                                                                                                                                                                  | MF       | 0.0041               |
| Helicase activity                                                                                                                                                                                 | MF       | 0.003                |
| RNA polymerase II core promoter proximal region sequence-specific DNA binding                                                                                                                     | MF       | 0.0225               |
| Core promoter proximal region sequence-specific DNA binding                                                                                                                                       | MF       | 0.0264               |
| Core promoter proximal region DNA binding                                                                                                                                                         | MF       | 0.028                |
| Atpase activity, coupled                                                                                                                                                                          | MF       | 0.005                |
| RNA polymerase II regulatory region sequence-specific DNA binding                                                                                                                                 | MF       | 0.0399               |
| RNA polymerase II regulatory region DNA binding                                                                                                                                                   | MF       | 0.0491               |
| Atpase activity                                                                                                                                                                                   | MF       | 0.0028               |
| Peptidase activity, acting on L-amino acid peptides                                                                                                                                               | MF       | 0.0176               |

| <b>GO term</b>                                                                     | <b>Ontology</b> | <b>Over-represented FDR</b> |
|------------------------------------------------------------------------------------|-----------------|-----------------------------|
| Oxidoreductase activity                                                            | MF              | 0.0045                      |
| Peptidase activity                                                                 | MF              | 0.02                        |
| Pyrophosphatase activity                                                           | MF              | 0.0273                      |
| Hydrolase activity, acting on acid anhydrides, in phosphorus-containing anhydrides | MF              | 0.0275                      |
| Hydrolase activity, acting on acid anhydrides                                      | MF              | 0.0278                      |
| Nucleoside-triphosphatase activity                                                 | MF              | 0.0441                      |
| Hydrolase activity                                                                 | MF              | 0.047                       |
| Catalytic activity                                                                 | MF              | 0.0014                      |
